# Supplementary material for: Tri-snRNP-associated proteins interact with subunits of the TRAMP and nuclear exosome complexes, linking RNA decay and pre-mRNA splicing
Source: PubMed Central journal article supplement — RNA Biol. 2012 Mar 1;9(3):334–42. doi: 10.4161/rna.19431 (PMC3384585; doi:10.4161/rna.19431), 2012-03-01
Supplement: rna-9-334-s01.pdf [file rna-9-334-s01.pdf]

**Supplemental Material to:**

Anita Nag and Joan A. Steitz. Tri-snRNP-associated proteins interact with subunits of the TRAMP and nuclear exosome complexes, linking RNA decay and pre-mRNA splicing. *RNA Biology* 2012. 9(3); <http://dx.doi.org/10.4161/rna.9.3.19431>;  
<http://www.landesbioscience.com/journals/rnabiology/article/19431>

### Supplemental Table S1

List of proteins identified by mass spectrometric analysis of Trf4-1 IP

| Human Protein Identified                                          | # Unique Peptides | NCBI Accession # | MW, kD |
|-------------------------------------------------------------------|-------------------|------------------|--------|
| Heat shock cognate 71 kDa protein                                 | 20                | HSP7C_HUMAN      | 70.85  |
| Heat shock 70 kDa protein 1                                       | 20                | HSP71_HUMAN      | 70.01  |
| Tubulin beta-2C chain                                             | 14                | TBB2C_HUMAN      | 49.79  |
| Actin, cytoplasmic 1                                              | 13                | ACTB_HUMAN       | 41.71  |
| DNA polymerase sigma/ Trf4-1                                      | 13                | POLS_HUMAN       | 59.84  |
| Tubulin beta chain                                                | 9                 | TBB5_HUMAN       | 49.64  |
| Tubulin alpha-1C chain                                            | 7                 | TBA1C_HUMAN      | 49.86  |
| Tubulin alpha-1A chain                                            | 7                 | TBA1A_HUMAN      | 50.10  |
| Actin, arotic smooth muscle                                       | 6                 | ACTA_HUMAN       | 41.98  |
| Heterogeneous nuclear ribonucleoprotein M                         | 6                 | HNRPM_HUMAN      | 77.46  |
| Tubulin beta-4 chain                                              | 4                 | TBB4_HUMAN       | 49.55  |
| Ubiquitin                                                         | 3                 | UBIQ_HUMAN       | 8.56   |
| Heterogeneous nuclear ribonucleoprotein H                         | 2                 | HNRH_HUMAN       | 49.19  |
| 60S ribosomal protein L7a                                         | 2                 | RL7A_HUMAN       | 29.97  |
| Methylosome protein 50                                            | 2                 | MEP50_HUMAN      | 36.70  |
| Heat shock protein HSP 90-beta                                    | 2                 | HS90B_HUMAN      | 83.21  |
| 40S ribosomal protein S3                                          | 2                 | RS3_HUMAN        | 26.67  |
| <i>Positive; Score &gt;60, expect &lt;1e-4, good y-ion series</i> |                   |                  |        |
| 60S ribosomal protein L11                                         | 1                 | RL11_HUMAN       | 20.24  |
| 78 kDa glucose-regulated protein                                  | 1                 | GRP78_HUMAN      | 72.28  |
| 40S ribosomal protein SA                                          | 1                 | RSSA_HUMAN       | 32.83  |
| 14-3-3 protein epsilon                                            | 1                 | 1433E_HUMAN      | 29.15  |
| Vimentin                                                          | 1                 | VIME_HUMAN       | 53.61  |
| 60S ribosomal protein L4                                          | 1                 | RL4_HUMAN        | 47.66  |
| <i>Probable; Score &gt;50, expect &lt;0.01, good y-ion series</i> |                   |                  |        |
| Stress-70 protein                                                 | 1                 | GRP75_HUMAN      | 73.63  |
| U4/U6 small nuclear ribonucleoprotein Prp31                       | 1                 | PRP31_HUMAN      | 55.42  |
| Elongation factor 1-alpha 1                                       | 1                 | EF1A1_HUMAN      | 50.11  |
| <i>Possible; Score &gt;30, expect &lt;0.1, good y-ion series</i>  |                   |                  |        |
| Component of gems 4                                               | 1                 | GEMI4_HUMAN      | 119.91 |
| 40S ribosomal protein S18                                         | 1                 | RS18_HUMAN       | 17.70  |
| 60S ribosomal protein L17                                         | 1                 | RL17_HUMAN       | 21.38  |
| Heterogeneous nuclear ribonucleoproteins C1/C2                    | 1                 | HNRPC_HUMAN      | 33.65  |
| Heat shock protein HSP 90-alpha                                   | 1                 | HS90A_HUMAN      | 84.60  |
| Protein KIAA1967                                                  | 1                 | K1967_HUMAN      | 102.83 |
| 60S acidic ribosomal protein P0                                   | 1                 | RLA0_HUMAN       | 34.25  |
| 40S ribosomal protein S25                                         | 1                 | RS25_HUMAN       | 13.73  |

**Supplemental Table S2**

Oligonucleotide sequences for PCR amplification and mutation of reported plasmids

| <b>Oligonucleotide #</b> | <b>Oligonucleotide sequence</b>                                      |
|--------------------------|----------------------------------------------------------------------|
| AN101                    | CCGCGCCCAAGCTTATGTCCCCTTGTCTGAAGAAGCAGC                              |
| AN102                    | GGCGCGGGAAGCTTCCATTATCTGCTGAGGCTCACGGG                               |
| AN110                    | CGGCCGCTCGAGCTACAAGTAGAGGCTGGCAGCAAACACAATATCTC                      |
| AN189                    | CGCCGCGGATCCGCCACCATGTCTCTGGCAGATGAGCTCTTAGC                         |
| AN190                    | CGGCGGCTCGAGTCACTTGTTCATCGTCGTCCTTGTAGTCGGTGGACATAAGGCCACTCTT        |
| AN202                    | CCAAGCACCGCATCGCCGAGTATGTGGAGTCC                                     |
| AN203                    | CCAAGCACCGCATCGCCGAGTATGTGGAGTCC                                     |
| AN204                    | GCCCCACACCGGCGCCATCGCCACAGTGACATCG                                   |
| AN205                    | GCCCCACACCGGCGCCATCGCCACAGTGACATCG                                   |
| AN206                    | CGTATATGGCGGGAAGGCCGCGCATCCGCGACC                                    |
| AN207                    | GGTCGCGGATGGCGGCCTTCCCGCCATATACG                                     |
| AN210                    | CGTGGCCTTCGCCCCACTCCAGGGCC                                           |
| AN211                    | GGCCCTGGAGTGGGGCGAAGGCCACG                                           |
| AN225                    | CGGCGGCTCGAGTCACTTGTTCATCGTCGTCCTTGTAGTCCATGCTGGAGAAATACTTCTGGTTGGCC |
| AN226                    | CGGCGGCTCGAGTCACTTGTTCATCGTCGTCCTTGTAGTCCATGCTGGAGAAATACTTCTGGTTGGCC |
| AN232                    | CCGGCCGCTCGAGCATGGCGGACGCATTCCGGAGATGAGC                             |
| AN244                    | ATCGCTTCTCGGCCTTTTGGC                                                |
| AN245                    | TGGTGCACCGTTCCTGGAGG                                                 |
| AN246                    | CGCTTCGGCAGCACATATAC                                                 |
| AN247                    | AGGGGCCATGCTAATCTTCT                                                 |
